# Supplementary material
Source: publisher figshare collection journal article supplement (https://springernature.figshare.com/ndownloader/files/15200168)
Supplement: Supplementary file [file 15200168]

**Data S1. Approximate cost calculation and time required for the shoot-tip culture method**

**A. One-time cost of reusable consumables for experiment with 5 replications:**

**Magenta boxes-** 11 EUR

**Cut end of falcon tubes -** 1.5 EUR

**B. Cost of non-reusable consumables for experiment with 5 replications:**

**½ conc. MS buffer –** ~5-10 cents

**U-<sup>13</sup>C glucose -** ~ 40 EUR

**Parafilm-** ~10-15 cents

**C. Time required for the shoot-tip set-up:**

**Autoclaving of the magenta boxes & clean bench UV sterilization:** 1-2 hours

**Shoot-tip isolation -** ~2 mins

**Shoot-tip sterilization -** 12 mins

**Shoot-tip system set-up -** ~5 mins
